# Supplementary material for: Cloning and Characterization of Maize miRNAs Involved in Responses to Nitrogen Deficiency
Source: PLoS One. 2012 Jan 3;7(1):e29669. doi: 10.1371/journal.pone.0029669 (PMC3250470; doi:10.1371/journal.pone.0029669)
Supplement: Table S5 — Normalized abundance of known-miRNAs in response to N deficiency. (XLS) [file pone.0029669.s005.xls]

## Sheet: Sheet1
Supplemental table 4
miRNA	Reads (normalized)				Fold change				P-value
	Shoot+N	Shoot-N	Root+N	Root-N	Shoot	Root	+N	-N	Shoot	Root	+N	-N
					(-N/+N)	(-N/+N)	(S/R)	(S/R)	(-N/+N)	(-N/+N)	(S/R)	(S/R)
Zma-miR156a	147338	257079	92548.7	177381	1.74482	1.91662	1.59201	1.44931	0	0	0	0
Zma-miR156b	177695	320692	97255.9	186560	1.80473	1.91823	1.82709	1.71898	0	0	0	0
Zma-miR156c	147330	257064	92542.3	177367	1.74482	1.9166	1.59203	1.44934	0	0	0	0
Zma-miR156d	177708	320733	97258.6	186568	1.80483	1.91827	1.82717	1.71912	0	0	0	0
Zma-miR156e	146920	256172	92301.1	176941	1.74362	1.91699	1.59174	1.44779	0	0	0	0
Zma-miR156f	147134	256391	92457.1	177188	1.74257	1.91644	1.59138	1.447	0	0	0	0
Zma-miR156g	147134	256391	92456.4	177188	1.74257	1.91645	1.59139	1.447	0	0	0	0
Zma-miR156h	146920	256172	92301.1	176941	1.74362	1.91699	1.59176	1.44779	0	0	0	0
Zma-miR156i	146920	256172	92301.1	176941	1.74362	1.91699	1.59174	1.44779	0	0	0	0
Zma-miR156j	743.918	544.691	15.4632	268.728	0.732192	17.3786	48.1089	2.02692	4.75258e-52	0	0	4.59174e-159
Zma-miR156k	5868.17	7787.85	4550.03	6660.2	1.32714	1.46377	1.2897	1.16931	0	0	8.69544e-308	9.18616e-146
Zma-miR156l	146917	256170	92300.2	176938	1.74363	1.91699	1.59173	1.44779	0	0	0	0
Zma-miR159a	155.993	168.581	94.756	50.2114	1.0807	0.529902	1.64625	3.35742	0.0554597	3.85431e-27	1.75237e-29	7.38498e-114
Zma-miR159b	155.262	167.564	94.2909	49.9676	1.07923	0.52993	1.64663	3.35345	0.0605552	5.18596e-27	2.24931e-29	4.99067e-113
Zma-miR159c			1.6277	4.8749		2.99496				0.00018154
Zma-miR159d			1.6277	4.8749		2.99496				0.00018154
Zma-miR159f	155.871	168.29	94.756	49.9676	1.07968	0.527329	1.64497	3.36799	0.0586541	1.80749e-27	2.19598e-29	4.48111e-114
Zma-miR159j	155.14	167.273	94.2909	49.7239	1.07821	0.527346	1.64533	3.36403	0.0640025	2.43203e-27	2.81898e-29	3.03167e-113
Zma-miR159k	155.14	167.273	94.2909	49.7239	1.07821	0.527346	1.64533	3.36403	0.0640025	2.43203e-27	2.81898e-29	3.03167e-113
Zma-miR160a	156.967	147.799	52.4355	47.4083	0.941594	0.904126	2.99352	3.11757	0.15167	0.145405	4.18736e-102	1.45106e-91
Zma-miR160b	156.723	147.799	52.4355	47.5302	0.943057	0.906451	2.98888	3.10958	0.162692	0.155677	9.64204e-102	2.85272e-91
Zma-miR160c	156.723	147.799	52.4355	47.5302	0.943057	0.906451	2.98888	3.10958	0.162692	0.155677	9.64204e-102	2.85272e-91
Zma-miR160d	157.941	150.124	52.5518	47.652	0.950509	0.906762	3.00543	3.15043	0.224169	0.156643	2.92984e-103	3.40888e-94
Zma-miR160e	157.941	150.124	52.5518	47.652	0.950509	0.906762	3.00543	3.15043	0.224169	0.156643	2.92984e-103	3.40888e-94
Zma-miR160f	0.7306	1.1626			1.59129				0.388794		2.92984e-103
Zma-miR160g	157.941	150.124	52.5518	47.652	0.950509	0.906762	3.00543	3.15043	0.224169	0.156643		3.40888e-94
zma-miR162	2.5573	7.4117	1.6277	3.8999	2.89825	2.39596	1.57111	1.90048	1.64445e-05	0.00487947	0.191206	0.00389746
zma-miR164a	56.0161	45.7784	469.013	596.93	0.817236	1.27274	0.119434	0.0766897	0.00563185	5.69685e-30	0	0
zma-miR164b	55.8943	45.4878	466.688	593.883	0.813818	1.27255	0.119768	0.0765938	0.00480323	8.55785e-30	0	0
zma-miR164c	55.8943	45.4878	466.688	593.883	0.813818	1.27255	0.119768	0.0765938	0.00480323	8.55785e-30	0	0
zma-miR164d	56.0161	45.7784	469.013	596.93	0.817236	1.27274	0.119434	0.0766897	0.00563185	5.69685e-30	0	0
zma-miR164e	47.6136	89.2316	763.745	1707.31	1.87408	2.23544	0.0623423	0.0522645	6.479e-23	0	0	0
zma-miR164f	3.2879	1.0173	24.5319	52.8926	0.309407	2.15607	0.134025	0.0192333	0.00299985	3.17543e-21	5.82455e-35	4.63205e-103
zma-miR164g	55.6507	45.4878	465.99	591.812	0.817381	1.27001	0.119425	0.076862	0.00583092	2.9249e-29	0	0
zma-miR164h	1.096	0.1453	3.953	1.0969	0.132573	0.277485	0.277258	0.132464	0.0252789	0.000196081	0.000194067	0.0251952
zma-miR166a	7381.09	9286.33	55705.3	39040.8	1.25813	0.700845	0.132502	0.237862	0	0	0	0
zma-miR166b	7380.24	9285.75	55696.2	39035.8	1.25819	0.700871	0.132509	0.237878	0	0	0	0
zma-miR166c	7380.24	9285.75	55696.2	39035.8	1.25819	0.700871	0.132509	0.237878	0	0	0	0
zma-miR166d	7380.24	9285.75	55696.2	39035.8	1.25819	0.700871	0.132509	0.237878	0	0	0	0
zma-miR166e	7380.24	9285.9	55696.2	39035.8	1.25821	0.700871	0.132509	0.237882	0	0	0	0
zma-miR166f	7763.7	9621.32	55725.1	39020.9	1.23927	0.70024	0.139321	0.246568	0	0	0	0
zma-miR166g	7762.24	9620.74	55723.8	39020.7	1.23943	0.700251	0.139298	0.246555	0	0	0	0
zma-miR166h	7763.7	9621.32	55725.1	39020.9	1.23927	0.70024	0.139321	0.246568	0	0	0	0
zma-miR166i	7379.63	9284.45	55695	39033.1	1.25812	0.700837	0.132501	0.237861	0	0	0	0
zma-miR166j	347.543	434.968	1.744	1.2187	1.25155	0.698796	199.279	356.911	9.84885e-18	0.390081	0	0
zma-miR166k	347.665	435.258	1.744	1.2187	1.25195	0.698796	199.349	357.15	8.69372e-18	0.390081	0	0
zma-miR166l	535.928	614.448	199.859	158.19	1.14651	0.791507	2.68152	3.88424	2.23027e-10	1.72129e-10	4.19535e-294	0
zma-miR166m	528.378	593.376	177.653	117.729	1.12301	0.662689	2.97421	5.0402	1.05294e-07	4.12998e-24	0	0
zma-miR166n	347.543	434.968	1.744	1.2187	1.25155	0.698796	199.279	356.911	9.84885e-18	0.390081	0	0
zma-miR167a	742.335	918.184	1427.5	3725.39	1.23689	2.60973	0.520024	0.246467	2.46483e-32	0	0	0
zma-miR167b	743.065	918.911	1428.55	3727.22	1.23665	2.6091	0.520154	0.246541	2.63173e-32	0	0	0
zma-miR167c	742.335	918.184	1427.5	3725.39	1.23689	2.60973	0.520024	0.246467	2.46483e-32	0	0	0
zma-miR167d	742.335	918.184	1427.5	3725.39	1.23689	2.60973	0.520024	0.246467	2.46483e-32	0	0	0
zma-miR167e	5762.35	12426.7	4198.56	6570.74	2.15654	1.565	1.37246	1.89122	0	0	0	0
zma-miR167f	5767.1	12434.7	4200.31	6572.33	2.15615	1.56473	1.37302	1.89198	0	0	0	0
zma-miR167g	2297.02	3157.11	1832.68	3858.96	1.37444	2.10563	1.25337	0.818125	8.02209e-225	0	1.10011e-97	3.7719e-116
zma-miR167h	2342.45	3193.3	1897.44	3947.44	1.36323	2.0804	1.23453	0.808954	8.81174e-217	0	1.46502e-87	1.68768e-131
zma-miR167i	2345.73	3195.77	1897.91	3949.39	1.36238	2.08092	1.23596	0.80918	3.84874e-216	0	1.41357e-88	3.06307e-131
zma-miR167j	5776.23	12456.7	4206.58	6574.15	2.15654	1.56283	1.37314	1.89479	0	0	0	0
zma-miR168a	55393.4	98460.5	109391	88789.8	1.77748	0.811671	0.506379	1.10892	0	0	0	0
zma-miR168b	55393.4	98460.7	109391	88789.8	1.77748	0.811671	0.506379	1.10892	0	0	0	0
zma-miR169a	88.0426	43.5985	7.3247	2.1937	0.495198	0.299493	12.02	19.8744	1.916e-26	9.74343e-07	5.40972e-150	9.80461e-79
zma-miR169b	80.0055	41.4186	7.6735	2.0718	0.517697	0.269994	10.4262	19.9916	7.22674e-22	1.12579e-07	1.10374e-129	5.68817e-75
zma-miR169c	254.264	125.418	98.0114	36.8054	0.49326	0.375522	2.59423	3.40761	7.73825e-74	2.43784e-54	1.37168e-133	1.2494e-86
zma-miR169f	9.6201	4.0692	3.7205	1.95	0.422989	0.524123	2.5857	2.08677	4.06104e-05	0.0324646	2.04202e-06	0.0169784
zma-miR169g	12.0556	4.0692	4.3018	1.95	0.337536	0.453299	2.80245	2.08677	4.15795e-08	0.00653418	1.52982e-08	0.0169784
zma-miR169h	9.7419	4.0692	3.7205	1.95	0.417701	0.524123	2.61844	2.08677	2.9506e-05	0.0324646	1.38198e-06	0.0169784
zma-miR169i	48.9532	30.083	28.2524	8.4092	0.614526	0.297646	1.73271	3.57739	6.42698e-09	2.61869e-22	6.28497e-12	3.54233e-23
zma-miR169j	48.9532	29.647	28.1361	8.2873	0.605619	0.294543	1.73987	3.5774	2.56897e-09	1.79908e-22	4.59669e-12	7.29141e-23
zma-miR169k	48.9532	29.7923	28.2524	8.2873	0.608587	0.293331	1.73271	3.59493	3.49851e-09	1.17538e-22	6.28497e-12	4.41547e-23
zma-miR169m	1.5831	0.7266			0.458973				0.141016
zma-miR169n	1.5831	0.7266			0.458973				0.141016
zma-miR169p	3.4097	2.7612	2.4416	1.2187	0.809807	0.49914	1.3965	2.26569	0.491555	0.0678116	0.248442	0.0328275
zma-miR169q	1.5831	0.7266			0.458973				0.141016
zma-miR169r	252.316	123.529	97.5463	36.4398	0.489581	0.373564	2.58663	3.38995	1.57981e-74	1.64109e-54	5.76441e-132	7.44564e-85
zma-miR171b	49.3185	38.076	21.044	39.4866	0.772043	1.87638	2.34359	0.964276	0.00103226	4.31931e-12	3.51154e-23	0.665159
zma-miR171d	50.1709	38.3667	21.1602	39.4866	0.76472	1.86608	2.371	0.971638	0.000617914	6.19515e-12	4.99485e-24	0.732353
zma-miR171e	50.1709	38.3667	21.1602	39.4866	0.76472	1.86608	2.371	0.971638	0.000617914	6.19515e-12	4.99485e-24	0.732353
zma-miR171f	49.1967	37.7854	21.044	39.4866	0.768047	1.87638	2.3378	0.956917	0.000841164	4.31931e-12	4.98147e-23	0.600321
zma-miR171g			5.3482	42.0459		7.86169				3.95338e-61
zma-miR171h	1.2177	3.6332	16.5096	19.987	2.98366	1.21063	0.0737571	0.181778	0.00221464	0.0951884	5.64783e-30	1.92007e-21
zma-miR171i	50.0491	38.2213	21.1602	39.6085	0.763676	1.87184	2.36525	0.964977	0.000591107	4.69754e-12	7.11051e-24	0.670986
zma-miR171j	50.2927	38.6573	21.1602	39.6085	0.768646	1.87184	2.37676	0.975985	0.000760741	4.69754e-12	3.50613e-24	0.772604
zma-miR171k	1.2177	3.6332	16.5096	19.987	2.98366	1.21063	0.0737571	0.181778	0.00221464	0.0951884	5.64783e-30	1.92007e-21
zma-miR171l	1.3395	2.1799			1.6274				0.218041
zma-miR171m	1.3395	2.1799			1.6274				0.218041
zma-miR172a	94.9837	79.9306	103.243	86.773	0.841519	0.840471	0.919999	0.921146	0.0018843	0.000537024	0.0893041	0.14839
zma-miR172b	94.9837	79.9306	103.243	86.773	0.841519	0.840471	0.919999	0.921146	0.0018843	0.000537024	0.0893041	0.14839
zma-miR172c	94.9837	79.9306	103.243	86.773	0.841519	0.840471	0.919999	0.921146	0.0018843	0.000537024	0.0893041	0.14839
zma-miR172d	94.9837	79.9306	103.243	86.773	0.841519	0.840471	0.919999	0.921146	0.0018843	0.000537024	0.0893041	0.14839
zma-miR172e	0.4871	1.308	1.6277	0.975	2.68528	0.599005	0.299257	1.34154	0.0937425	0.254294	0.0249766	0.539863
zma-miR319a			30.2289	21.5714		0.713602				0.000490873
zma-miR319b			34.7632	27.5431		0.792306				0.00809105
zma-miR319c			30.1126	21.5714		0.716358				0.0144994
zma-miR319d			34.7632	27.5431		0.792306				0.00809105
zma-miR390a	61.4959	64.8164	16.1608	22.6682	1.054	1.40267	3.80525	2.85935	0.416704	0.00243047	1.18078e-53	8.08473e-37
zma-miR390b	61.4959	64.8164	16.1608	22.6682	1.054	1.40267	3.80525	2.85935	0.416704	0.00243047	1.18078e-53	8.08473e-37
zma-miR393a	20.8234	15.5501	8.3711	14.8684	0.746761	1.77616	2.48753	1.04585	0.0173388	8.61147e-05	1.15974e-11	0.729963
zma-miR393b	5.9669	3.9239	3.953	9.3842	0.657611	2.37394	1.50946	0.418139	0.0799366	1.30365e-05	0.064076	4.23905e-05
zma-miR393c	20.5798	15.5501	8.2548	14.8684	0.7556	1.80118	2.49307	1.04585	0.0228041	6.11617e-05	1.40025e-11	0.729963
zma-miR394a	9.1331	20.6366	4.3018	5.8499	2.25954	1.35987	2.12309	3.52768	4.31767e-09	0.159903	0.000117396	3.80186e-16
zma-miR394b	9.1331	20.6366	4.3018	5.8499	2.25954	1.35987	2.12309	3.52768	4.31767e-09	0.159903	0.000117396	3.80186e-16
zma-miR395a	6.5758	5.0865	29.8801	2.5593	0.773518	0.0856523	0.220073	1.98746	0.241069	1.13922e-50	5.0675e-31	0.0115422
zma-miR395b	6.5758	5.0865	29.7638	2.5593	0.773518	0.085987	0.220933	1.98746	0.241069	2.05922e-50	8.20002e-31	0.0115422
zma-miR395d	6.5758	5.0865	29.7638	2.5593	0.773518	0.085987	0.220933	1.98746	0.241069	2.05922e-50	8.20002e-31	0.0115422
zma-miR395e	6.5758	5.0865	29.7638	2.5593	0.773518	0.085987	0.220933	1.98746	0.241069	2.05922e-50	8.20002e-31	0.0115422
zma-miR395f	6.5758	5.0865	29.7638	2.5593	0.773518	0.085987	0.302238	1.98746	0.241069	2.05922e-50	8.20002e-31	0.0115422
zma-miR395g	6.5758	5.0865	29.7638	2.5593	0.773518	0.085987	0.302238	1.98746	0.241069	2.05922e-50	8.20002e-31	0.0115422
zma-miR395h	6.5758	5.0865	29.7638	2.5593	0.773518	0.085987	0.302238	1.98746	0.241069	2.05922e-50	8.20002e-31	0.0115422
zma-miR395i	6.5758	5.0865	29.7638	2.5593	0.773518	0.085987	0.302238	1.98746	0.241069	2.05922e-50	8.20002e-31	0.0115422
zma-miR395j	6.5758	5.0865	29.7638	2.5593	0.773518	0.085987	0.302238	1.98746	0.241069	2.05922e-50	8.20002e-31	0.0115422
zma-miR395n	6.5758	5.0865	29.7638	2.5593	0.773518	0.085987	0.302238	1.98746	0.241069	2.05922e-50	8.20002e-31	0.0115422
zma-miR395o	1.2177	0.7266	4.4181	0.6094	0.596699	0.137933	0.979158	1.19232	0.369215	3.11159e-07	7.53526e-05
zma-miR395p	6.5758	5.0865	29.7638	2.5593	0.773518	0.085987	0.302238	1.98746	0.241069	2.05922e-50	8.20002e-31	0.0115422
zma-miR396a	62.4701	57.986	37.0885	22.5464	0.92822	0.607908	0.0411693	2.57185	0.265765	4.4551e-08	1.19354e-13	1.9682e-28
zma-miR396b	62.4701	57.986	37.0885	22.5464	0.92822	0.607908	0.0411693	2.57185	0.265765	4.4551e-08	1.19354e-13	1.9682e-28
zma-miR396c	391.991	272.636	262.875	283.475	0.695516	1.07836	0.00245354	0.961764	9.08102e-37	0.0106232	8.27938e-49	0.209417
zma-miR396d	391.991	272.636	262.875	283.475	0.695516	1.07836	0.00245354	0.961764	9.08102e-37	0.0106232	8.27938e-49	0.209417
zma-miR396e	16.5613	15.1141	2.209	0.4875	0.912616	0.220688	1.87203	31.0033	0.487741	0.0022577	1.92659e-24	1.6008e-30
zma-miR396f	16.5613	15.1141	2.209	0.4875	0.912616	0.220688	1.87203	31.0033	0.487741	0.0022577	1.92659e-24	1.6008e-30
zma-miR397a	5.6016	1.308			0.233505				6.20518e-06
zma-miR397b	170.362	43.1625	14.1843	5.8499	0.253358	0.412421	0.0433097	7.37833	1.75338e-131	5.09903e-08	1.74545e-288	2.32561e-55
zma-miR398a	265.224	126.726	81.8505	83.1169	0.477809	1.01547	0.00574864	1.52468	1.57557e-82	0.774529	4.40941e-189	1.11648e-16
zma-miR398b	264.493	127.162	81.7343	83.3606	0.480777	1.0199	0.00576744	1.52545	3.24795e-81	0.713233	2.89271e-188	9.18393e-17
zma-miR399a			7.3247	1.0969		0.149754				8.57727e-11
zma-miR399c			7.3247	1.0969		0.149754				8.57727e-11
zma-miR399e	6.2105	7.2664	1.5114	1.0969	1.17002	0.725751	1.06666	6.62449	0.426297	0.472082	4.59424e-07	5.88087e-10
zma-miR399g			3.2554	0.01		0.00307182				7.31607e-09
zma-miR399h			7.3247	1.0969		0.149754				8.57727e-11
zma-miR399i	6.2105	7.1211	1.5114	1.0969	1.14662	0.725751	1.04533	6.49202	0.489459	0.472082	4.59424e-07	1.09943e-09
zma-miR399j	6.2105	7.1211	1.5114	1.0969	1.14662	0.725751	1.04533	6.49202	0.489459	0.472082	4.59424e-07	1.09943e-09
zma-miR408	1072.22	215.522	394.487	145.516	0.201005	0.368873	0.00138133	1.48109	0	6.32118e-219	0	3.63137e-24
zma-miR408b	1070.52	214.795	393.789	144.541	0.200647	0.36705	0.00138817	1.48606	0	3.71693e-220	0	1.9448e-24
zma-miR528a	17074.1	6959.48	8001.59	515.885	0.407606	0.0644728	0.000790109	13.4904	0	0	0	0
zma-miR528b	17052.9	6928.82	8001.59	516.251	0.406314	0.0645185	0.000787048	13.4214	0	0	0	0
zma-miR529	29.2258	28.4844			0.974632				0.794087
zma-miR827	363.374	498.04	79.7578	16.5746	1.3706	0.207812	0.0826928	30.0484	1.84432e-36	9.7048e-84	0	0
zma-miR1432	184.609	188.2	36.2747	52.4051	1.01945	1.44467	0.0194533	3.59126	0.609297	6.40236e-07	5.46082e-202	1.03615e-136
Know miRNAs are ones previously reported by Zhang et al.(2009)
Expression profiles expressed in sequence reads per million genome reads
